# Supplementary material for: Neural cortical organoids from self-assembling human iPSC as a model to investigate neurotoxicity in brain ischemia
Source: PubMed Central journal article supplement — J Cereb Blood Flow Metab. 2023 Jan 18;43(5):680–93. doi: 10.1177/0271678X231152023 (PMC10108182; doi:10.1177/0271678x231152023), 2023-01-18
Supplement: sj-pdf-1-jcb-10.1177_0271678X231152023.pdf [file sj-pdf-1-jcb-10.1177_0271678X231152023.pdf]

## Astrocytic markers

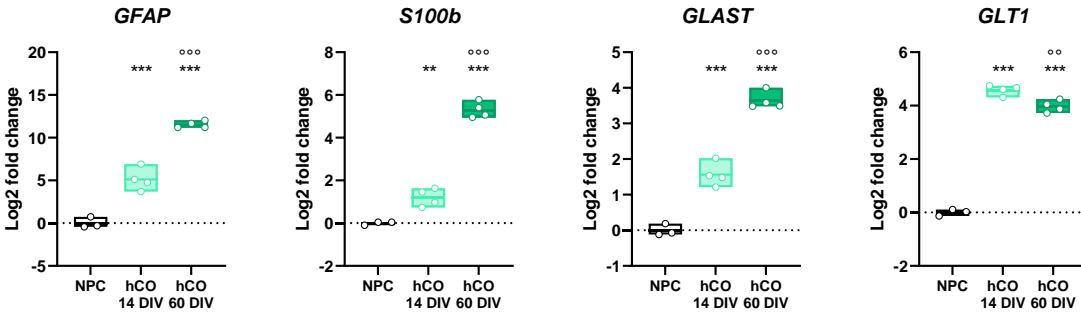

## Neuronal markers

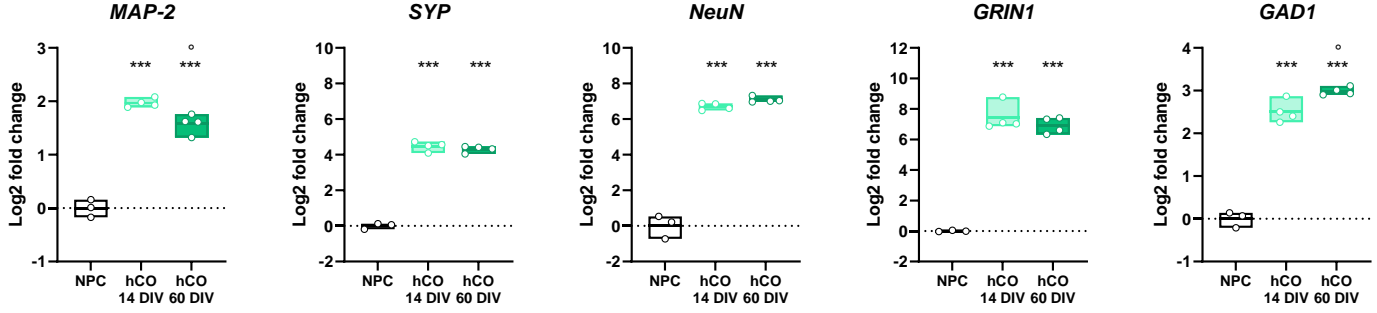

## Stem cell markers

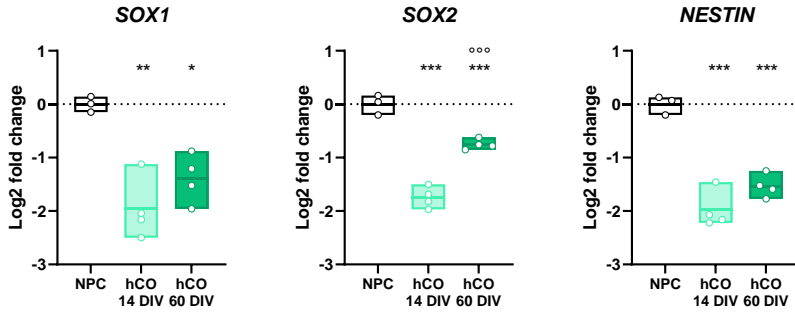

## Immature neurons

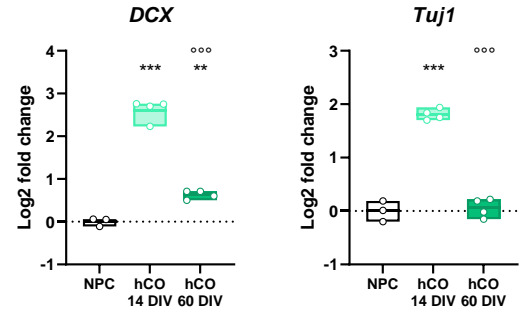

## Supplementary Figure 1. Characterization of hCO during differentiation

Relative gene expression analysis for astrocytic markers (*GFAP*, *S100b*, *GLAST*, *GLT1*), markers of differentiated neurons (*MAP-2*, *SYP*, *NeuN*, *GRIN1*, *GAD1*), stem cell markers (*SOX1*, *SOX2*, *NESTIN*) and markers associated with immature neurons (*DCX*, *Tuj1*). Data are shown as floating min-to-max bars with line at mean. Symbols indicate individual hCO (n= 3-4). One-way ANOVA followed by Tukey's multiple comparisons. \*p< 0.05, \*\*p< 0.01, \*\*\*p< 0.001 vs NPC, °p< 0.05, °°p<0.01; °°° p<0.001 vs hCO 14DIV.

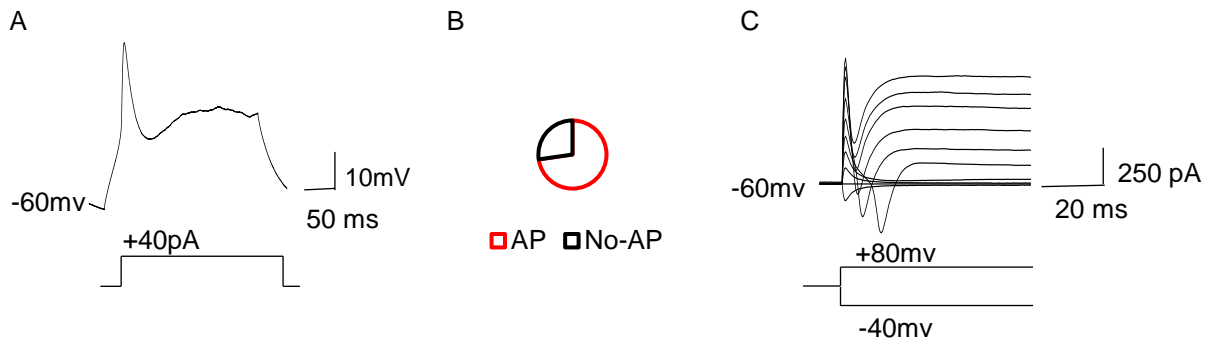

**Supplementary Figure 2. Electrophysiological properties of hCO neurons (DIV 60)**

A) Representative voltage trace of current clamp recordings in response to depolarising current step. B) Incidence of neurons firing action potentials (AP) in response to depolarising current steps (8/11). C) Representative traces of voltage clamp recordings showing fast inward currents followed by long-lasting outward currents in response to voltage steps in 10 mV increments.
